# Supplementary material for: Investigation of Aquaporins Involved in the Adaptation of Canavalia Rosea to Saline-alkaline Soils and Drought Stress
Source: Research Square preprint supplement (doi:10.21203/rs.3.rs-145436/v1), 2021-01-18
Supplement: Supplementary file 1 [file 72bbf92a5bcfd6bb2b8a6273.docx]

**Investigation of aquaporins involved in the adaptation of Canavalia rosea to saline-alkaline soils and drought stress**

**Ruoyi Lin 1, 2, #, Jiexuan Zheng 1, 2, #, Lin Pu 1, 2, Zhengfeng Wang 1, 3, 4, Qiming Mei 1, 3, 4, Mei Zhang 1, 5,* , Shuguang Jian 1, 3, 4, 6, ***

**1** Guangdong Provincial Key Laboratory of Applied Botany & Key Laboratory of South China Agricultural Plant Molecular Analysis and Genetic Improvement, South China Botanical Garden, Chinese Academy of Sciences, Guangzhou 510650, China.

**2** University of the Chinese Academy of Sciences, Beijing 100039, China.

**3** Key Laboratory of Vegetation Restoration and Management of Degraded Ecosystems, Center for Plant Ecology, Core Botanical Gardens, Chinese Academy of Sciences, Guangzhou 510650, China.

**4** Southern Marine Science and Engineering Guangdong Laboratory (Guangzhou), Guangzhou 511458, China

**5** Center of Economic Botany, Core Botanical Gardens, Chinese Academy of Sciences, Guangzhou, 510650, China.

**6** CAS Engineering Laboratory for Vegetation Ecosystem Restoration on Islands and Coastal Zones, South China Botanical Garden, Chinese Academy of Sciences, Guangzhou 510650, China

**#** These two authors contributed equally to this study.

***** Correspondence and requests for materials should be addressed to Mei Zhang (zhangmei@scbg.ac.cn) and Shuguang Jian (jiansg@scbg.ac.cn).

**Additional file 1: Figure S1.** The structural features of the CrAQPs. **a** CrNIPs. **b** CrPIPs. **c** CrTIPs. **d** CrXIPs. **e** CrSIPs.

**Additional file 1: Figure S2.** The overexpression analyses of *CrPIP1;5* in the three transgenic Arabidopsis lines (*OX 1#*, *OX 5#*, and *OX 10#*). **a** RT-PCR and genomic DNA PCR analysis of *CrPIP1;5* in the transgenic Arabidopsis lines and WT plants. **b** Quantitative RT-PCR analysis of *CrPIP1;5* in the transgenic Arabidopsis lines and WT plants.

**Additional file 1: Figure S3.** Overexpression analyses of *CrPIP1;5* in the transgenic Arabidopsis lines (*OX 1#*, *OX 5#*, and *OX 10#*) and stress tolerance analyses of transgenic plants with regards to seed germination rates. **a** Photographs of the transgenic lines and WT seeds germinated on MS medium or MS medium with NaCl, NaCl plus NaHCO3 (pH 8.2), or mannitol for 7 d. **b‒d** The seed germination rates in WT and transgenic lines under NaCl (**b**), NaCl plus NaHCO3 (pH 8.2) (**c**), and mannitol (**d**) stresses after 7 d.

**Additional file 1: Figure S4.** Salt, salt-alkaline, and high osmotic stress analyses of the transgenic plants with *CrPIP1;5*’s overexpression based on seedling root lengths. Four-day-old seedlings were transplanted into MS medium containing NaCl, NaCl plus NaHCO3 (pH 8.2) or mannitol and then grown for 7 d before measuring the root length. **a** Photographs of the transgenic lines (*CrPIP1;5* *OX 1#*, *OX 5#*, and *OX 10#*) and WT seedlings on MS medium or MS medium with NaCl, NaCl plus NaHCO3 (pH 8.2), or mannitol; **b‒d** The seedling root lengths (mm) in WT and the transgenic lines under NaCl (**b**), NaCl plus NaHCO3 (pH 8.2) (**c**), or mannitol (**d**) stresses after 7 d. Error bars indicate the SD based on over three replicates (n ≥ 3). Asterisks indicate significant differences from the control (Student’ s *t*-test P values, * p < 0.05 and ** p < 0.01).

**Additional file 1: Figure S5.** Subcellular localization of the CrPIP1;5 protein. Arabidopsis roots expressing 35S:GFP-CrPIP1;5 fusion proteins (upper two lines) and 35S:GFP (lower line) were observed under a laser scanning confocal microscope.

**Additional file 1: Table S1.** The obtained *CrAQP*s’ nucleotide and protein sequences information in this study.

**Additional file 1: Table S2.** Primers' information used in this study.

**Additional file 1: Table S3.** The categories of *cis*-acting elements identified in the *CrAQP*s’ promoter regions.

**Additional file 1: Table S4.** The conserved motif sequences of the CrAQPs identified by the MEME web server.

**Figure S1**


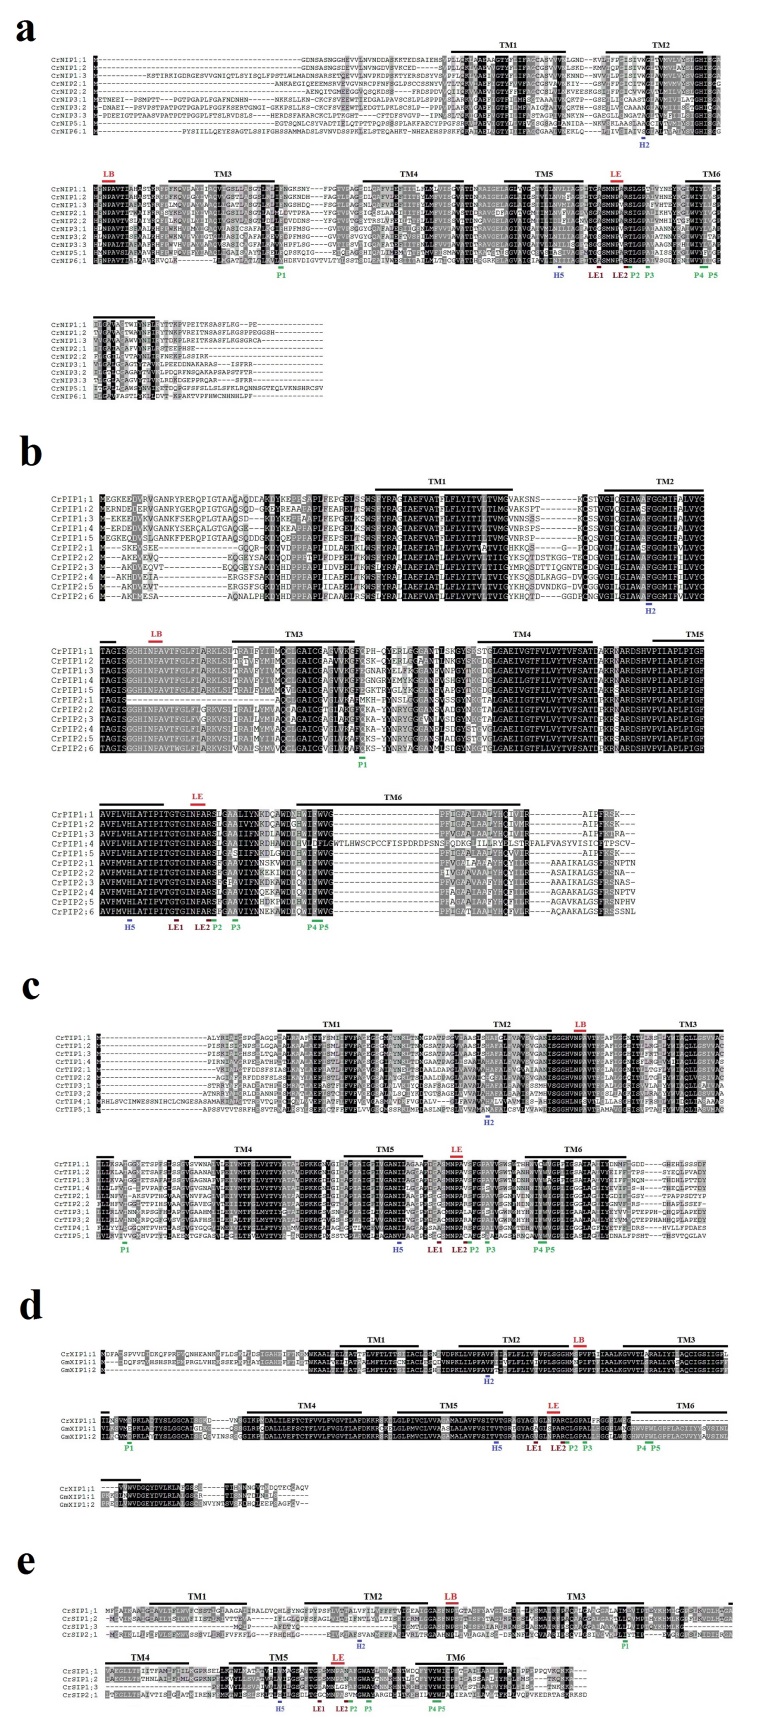


**Figure S2**


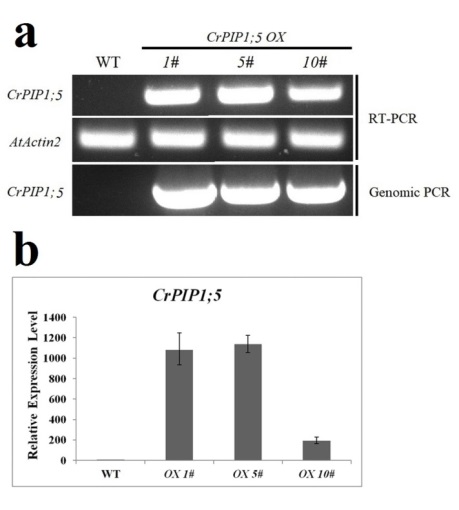


**Figure S3**


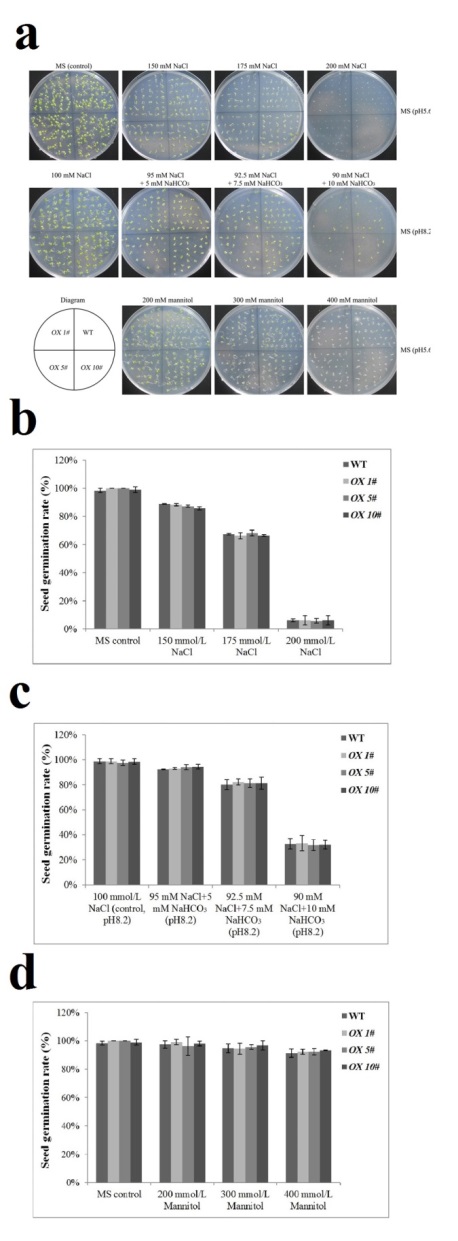


**Figure S4**


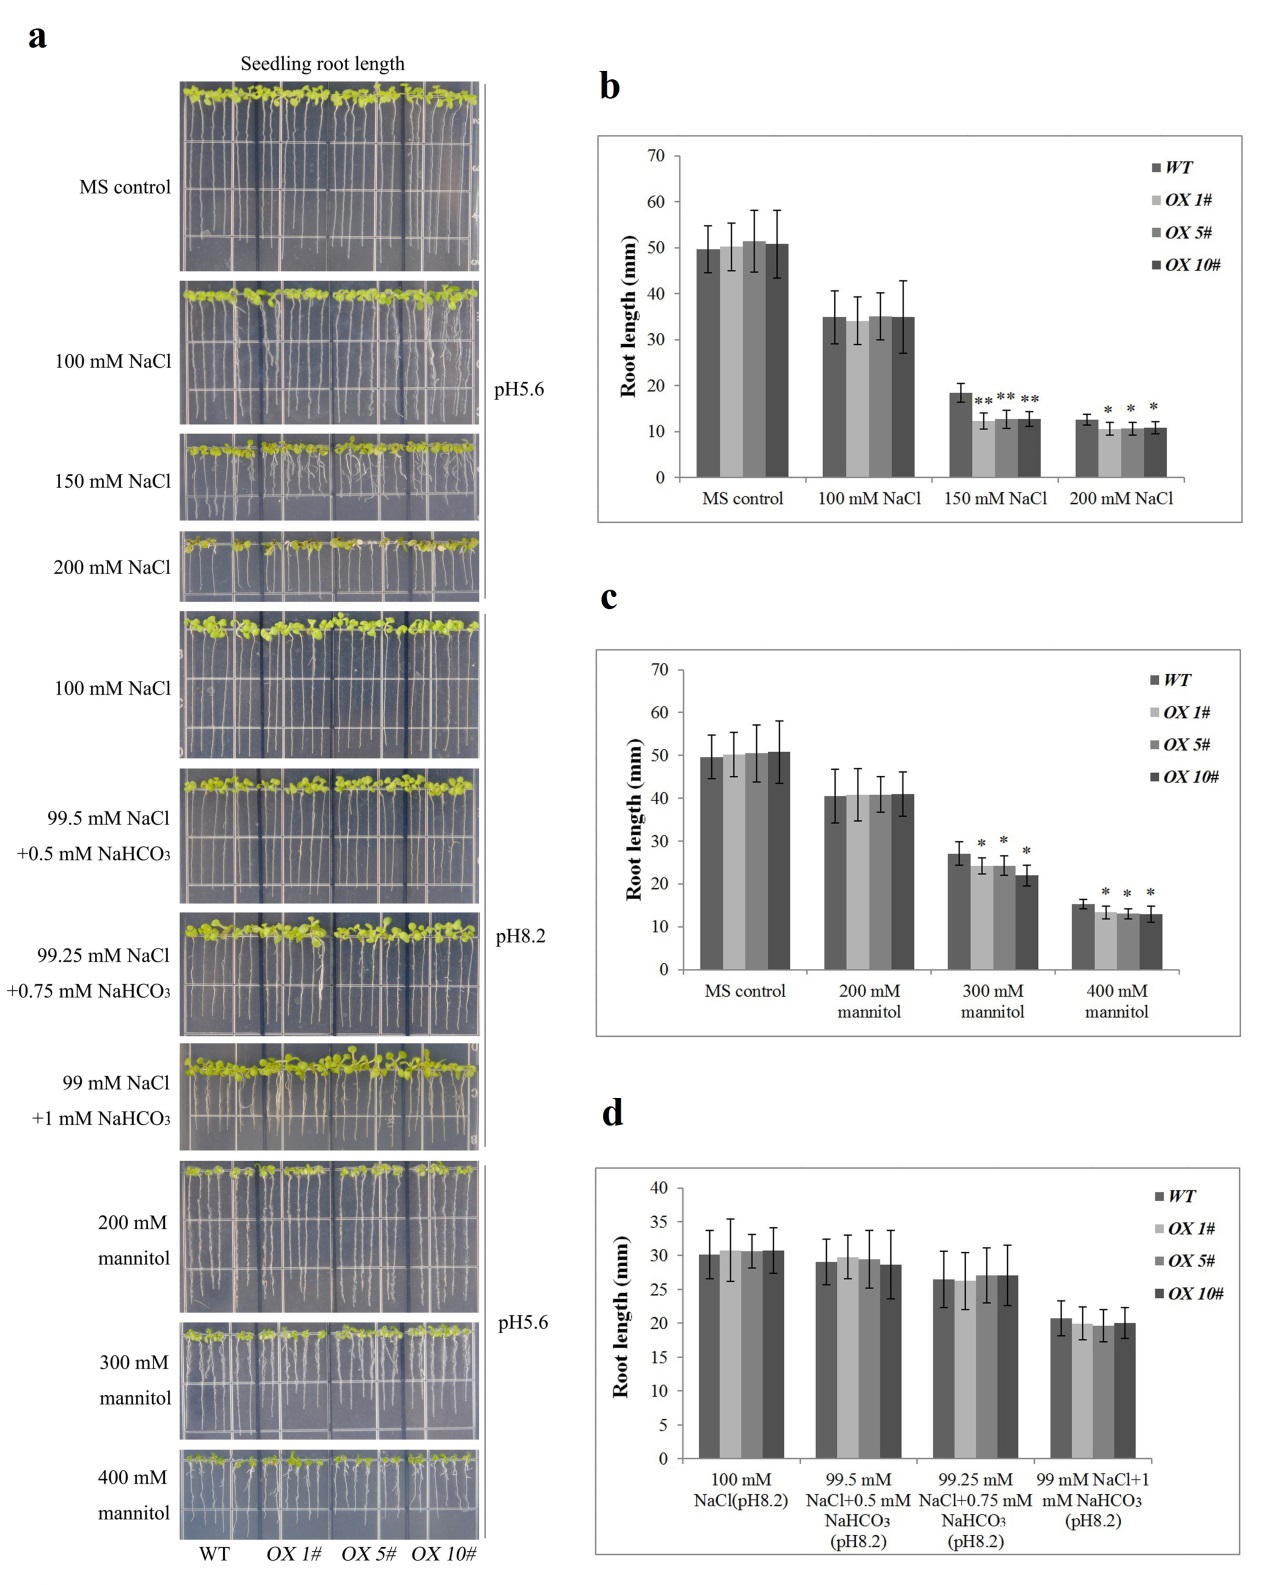


**Figure S5**


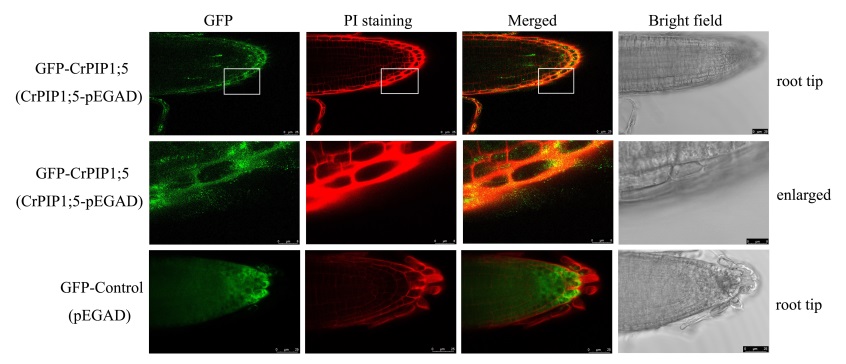


**Table S1**

See attached file.

**Table S2**

| **Primer ID** | **Sequence (from 5′ to 3′)** | **Purpose** |
| --- | --- | --- |
| CrPIP1;1RTF | TGTGAGAGTTGGTGCCAATAG | Primer pair for qRT-PCR of *CrPIP1;1* in *C. rosea* |
| CrPIP1;1RTR | CTGAAGGTGGCTCTTTGTAGTC |
| CrPIP1;2RTF | GTTCTTGGCACGCAAGTTATC | Primer pair for qRT-PCR of *CrPIP1;2* in *C. rosea* |
| CrPIP1;2RTR | CACCACCAAGCCTCTCATATT |
| CrPIP1;3RTF | CGGCATTAACCCAGCTAGAA | Primer pair for qRT-PCR of *CrPIP1;3* in *C. rosea* |
| CrPIP1;3RTR | AAGGGCAGCTCCAACAAA |
| CrPIP1;4RTF | AGGAGTCTAGGTGCTGCTATAA | Primer pair for qRT-PCR of *CrPIP1;4* in *C. rosea* |
| CrPIP1;4RTR | CGGATCACGATCTGGTGATATAAA |
| CrPIP1;5RTF | AGGGGTTAACCTTGTGAGCG | Primer pair for qRT-PCR of *CrPIP1;5* in *C. rosea* |
| CrPIP1;5RTR | TGGTCATCCCAGGCTTTGTC |
| CrPIP2;1RTF | CCGTCATAGGCCACAAGAAA | Primer pair for qRT-PCR of *CrPIP2;1* in *C. rosea* |
| CrPIP2;1RTR | GTGCAGTAGACGAGGACAAAG |
| CrPIP2;2RTF | CTGTGGCTGATGGCTACAATA | Primer pair for qRT-PCR of *CrPIP2;2* in *C. rosea* |
| CrPIP2;2RTR | CTTAGGATCAGTGGCAGAGAAG |
| CrPIP2;3RTF | AGCAACCCTTCTCTTCCTTTAC | Primer pair for qRT-PCR of *CrPIP2;3* in *C. rosea* |
| CrPIP2;3RTR | CGTCACATTCGGTGTTACCT |
| CrPIP2;4RTF | TGCCACACTTCTCTTCCTTTAC | Primer pair for qRT-PCR of *CrPIP2;4* in *C. rosea* |
| CrPIP2;4RTR | CAACACCACCACAAACATCAC |
| CrPIP2;5RTF | GCAGTGACATTTGGGTTGTTT | Primer pair for qRT-PCR of *CrPIP2;5* in *C. rosea* |
| CrPIP2;5RTR | CCAACCCAACTCCACAGATAG |
| CrPIP2;6RTF | GGAAAGTGTCGCTGGTTAGA | Primer pair for qRT-PCR of *CrPIP2;6* in *C. rosea* |
| CrPIP2;6RTR | CTCCTGCGTATCTGTTGTAGTAG |
| CrEF-αRTF | GACCTTCTTCGTTTCTCGCA | Primer pair for qRT-PCR of reference gene CrEF-α in *C. rosea* |
| CrEF-αRTR | CGAACCTCTCAATCACACGC |
| CrPIP1;5OXF | GGCAGCGGCCGAATTC ATGGAGGGGAAGGAACAGGA | Primer pair for cloning the full-length CDS of *CrPIP2;3* and construction of *CrPIP1;5*-pEGAD, *Eco*RI and *Bam*HI sites were underlined |
| CrPIP1;5OXR | CAGTTATCTAGGATCC TTACTTGGACTTGAAAGGAATGG |
| AtACT2RTF | GGTAACATTGTGCTCAGTGGTGG | Primer pair for qRT-PCR of reference gene *AtActin2* (*At3g18780*) in Arabidopsis |
| AtACT2RTF | AACGACCTTAATCTTCATGCTGC |

**Table S3**

See attached file.

**Table S4**

| **Group** | **Motif** | **E-value** | **Consensus sequence** |
| --- | --- | --- | --- |
| CrNIP | 8 | 1.1e-149 | 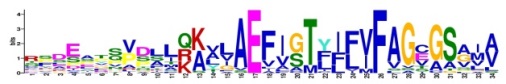  RSDEATSVDLLQKVLAEFIGTYIFVFAGCGSAIA |
| 2 | 9.6e-335 | 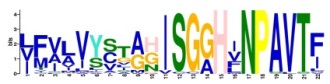  LFVLVYSTAHISGGHINPAVTF |
| 6 | 1.1e-276 | 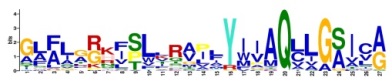  GLFLGRKFSLLRAILYIIAQLLGSICA |
| 7 | 5.1e-181 | 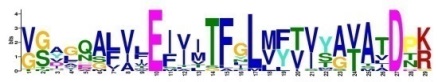  VGAGQALVLEIIITFGLMFTVYAVATDPK |
| 1 | 1.3e-365 | 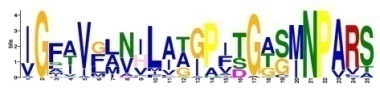  IGFAVFLNILAAGPITGASMNPARS |
| 4 | 1.4e-370 | 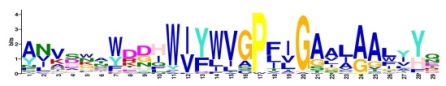  ANVSNAWDDHWIYWVGPFIGAALAALYYQ |
| CrPIP | 3 | 1.1e-312 | 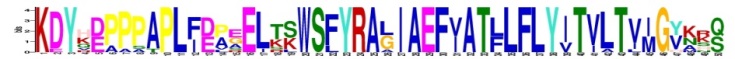  KDYHDPPPAPLFDPEELTSWSFYRAGIAEFVATLLFLYITVLTVIGYKKQ |
| 10 | 5.9e-061 | 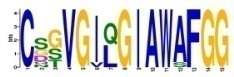  CSGVGILGIAWAFGG |
| 2 | 9.6e-335 | 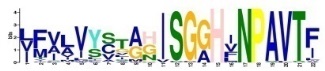  LFVLVYSTAHISGGHINPAVTF |
| 6 | 1.1e-276 | 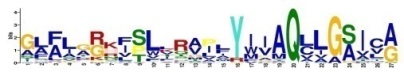  GLFLGRKFSLLRAILYIIAQLLGSICA |
| 9 | 2.7e-079 | 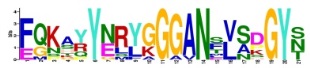  FQKAYYNRYGGGANSVSDGYS |
| 5 | 2.5e-284 | 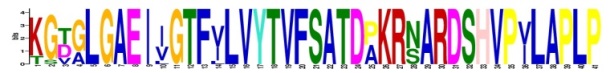  KGTGLGAEIIGTFVLVYTVFSATDPKRNARDSHVPVLAPLP |
| 1 | 1.3e-365 | 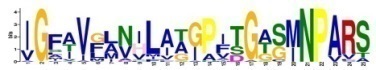  IGFAVFLNILAAGPITGASMNPARS |
| 4 | 1.4e-370 | 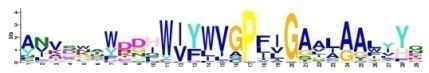  ANVSNAWDDHWIYWVGPFIGAALAALYYQ |
| CrTIP | 8 | 1.1e-149 | 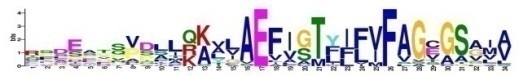  RSDEATSVDLLQKVLAEFIGTYIFVFAGCGSAIA |
| 2 | 9.6e-335 | 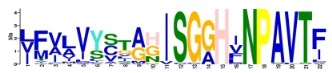  LFVLVYSTAHISGGHINPAVTF |
| 6 | 1.1e-276 | 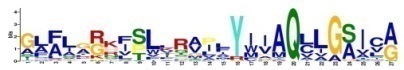  GLFLGRKFSLLRAILYIIAQLLGSICA |
| 7 | 5.1e-181 | 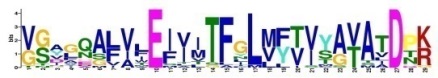  VGAGQALVLEIIITFGLMFTVYAVATDPK |
| 1 | 1.3e-365 | 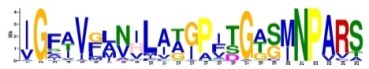  IGFAVFLNILAAGPITGASMNPARS |
| 4 | 1.4e-370 | 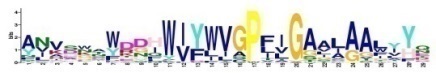  ANVSNAWDDHWIYWVGPFIGAALAALYYQ |
| CrXIP | 6 | 1.1e-276 | 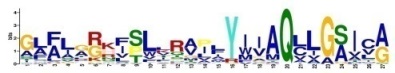  GLFLGRKFSLLRAILYIIAQLLGSICA |
| CrSIP | 6 | 1.1e-276 | 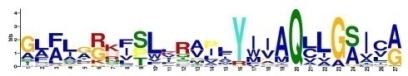  GLFLGRKFSLLRAILYIIAQLLGSICA |
| 4 | 1.4e-370 | 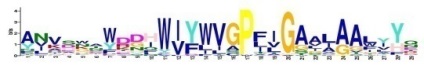  ANVSNAWDDHWIYWVGPFIGAALAALYYQ |
